# Supplementary material for: Influence of in vitro gastrointestinal digestion and colonic fermentation on carbonyl scavenging capacity of fiber-bound polyphenols from quinoa
Source: Royal Society of Chemistry journal article supplement (doi:10.1039/d3fo03000h), 2023-01-01
Supplement: d3fo03000h2.xlsx [file d3fo03000h2.xlsx]

## Sheet: Total phenolic content
Raw data
Total phenolic content
Gallic acid concentration (mg/mL)	Absorbance
0.02	0.271
0.04	0.373
0.06	0.486
0.08	0.597
0.1	0.702
The standard curve and regression equation
Bound polyphenols content of quinoa BP-IDF
Absorbance		*dilution multiple (10×)	*resolution volume (20 mL)
0.421	0.0480663	0.480663	9.61326
0.433	0.0502762	0.502762	10.0552
0.442	0.0519337	0.519337	10.3867
TPC mg GAE/100 g DW
961.326
1005.52
1038.67
mean	SD
1001.84	38.8054
Reseased polyphenols from quinoa BP-IDF
Simulated GI digestion
Absorbance		*resolution volume (5 mL)	TPC mg GAE/100 g DW
0.346	0.0342541	0.171271	17.1271
0.342	0.0335175	0.167587	16.7587
0.347	0.0344383	0.172192	17.2192
mean	SD
17.035	0.243624
Colonic fermentation for 6 h
Absorbance		*dilution multiple (3×)	*resolution volume (1 mL)
0.451	0.0535912	0.160773	0.160773
0.464	0.0559853	0.167956	0.167956
0.446	0.0526703	0.158011	0.158011
TPC mg GAE/100 mg DW	TPC mg GAE/100 g DW
0.160773	160.773
0.167956	167.956
0.158011	158.011
mean	SD
162.247	5.13347
Colonic fermentation for 12 h
Absorbance		*dilution multiple (3×)	*resolution volume (1 mL)
0.663	0.0926335	0.277901	0.277901
0.685	0.0966851	0.290055	0.290055
0.687	0.0970534	0.29116	0.29116
TPC mg GAE/100 g DW	TPC mg GAE/100 g DW
0.277901	277.901
0.290055	290.055
0.29116	291.16
mean	SD
286.372	7.35727
Colonic fermentation for 24 h
Absorbance		*dilution multiple (3×)	*resolution volume (1 mL)
0.652	0.0906077	0.271823	0.271823
0.664	0.0928177	0.278453	0.278453
0.637	0.0878453	0.263536	0.263536
TPC mg GAE/100 g DW	TPC mg GAE/100 g DW
0.271823	271.823
0.278453	278.453
0.263536	263.536
mean	SD
271.271	7.47389
Total phenolic content of quinoa BP-IDF after alkaline hydrolysis
Absorbance		*dilution multiple (10×)	*resolution volume (20 mL)
0.431	0.0499079	0.499079	9.98158
0.453	0.0539595	0.539595	10.7919
0.427	0.0491713	0.491713	9.83425
TPC mg GAE/100 g DW
998.158
1079.19
983.425
mean	SD
1020.26	51.5654
Total phenolic content of quinoa BP-IDF after acid hydrolysis
Absorbance		*dilution multiple (2×)	*resolution volume (20 mL)
0.412	0.0464088	0.0928177	1.85635
0.408	0.0456722	0.0913444	1.82689
0.398	0.0438306	0.0876611	1.75322
TPC mg GAE/100 g DW
185.635
182.689
175.322
mean	SD
181.215	5.31205
Total phenolic content of rye BP-IDF after alkaline hydrolysis
Absorbance		*dilution multiple (10×)	*resolution volume (20 mL)
0.386	0.0416206	0.416206	8.32413
0.393	0.0429098	0.429098	8.58195
0.405	0.0451197	0.451197	9.02394
TPC mg GAE/100 g DW
832.413
858.195
902.394
mean	SD
864.334	35.3924
Total phenolic content of rye BP-IDF after acid hydrolysis
Absorbance		*dilution multiple (2×)	*resolution volume (20 mL)
0.315	0.0285451	0.0570902	1.1418
0.328	0.0309392	0.0618785	1.23757
0.32	0.0294659	0.0589319	1.17864
TPC mg GAE/100 g DW
114.18
123.757
117.864
mean	SD
118.6	4.83053
Total phenolic content of wheat BP-IDF after alkaline hydrolysis
Absorbance		*dilution multiple (10×)	*resolution volume (20 mL)
0.336	0.0324125	0.324125	6.4825
0.317	0.0289134	0.289134	5.78269
0.327	0.0307551	0.307551	6.15101
TPC mg GAE/100 g DW
648.25
578.269
615.101
mean	SD
613.874	35.0069
Total phenolic content of wheat BP-IDF after acid hydrolysis
Absorbance		*dilution multiple (2×)	*resolution volume (20 mL)
0.288	0.0235727	0.0471455	0.94291
0.285	0.0230203	0.0460405	0.92081
0.276	0.0213628	0.0427256	0.854512
TPC mg GAE/100 g DW
94.291
92.081
85.4512
mean	SD
90.6077	4.60037

## Sheet: Polyphenols composition
Profiles and content of polyphenols
The standard curve and regression equation
	caffeic acid			p-coumaric acid
5	374000		5	348777
10	719794		10	679695
20	1577413		20	1343921
25	2039854		25	1642601
50	4131754		50	3338427
	ferulic acid			sinapic acid
5	278690		5	302155
10	541211		10	589669
20	1131458		20	1252453
25	1481356		25	1624734
50	2957910		50	3270015
	myricetin			quercetin
2.5	50272		5	70964
5	86439		10	152953
10	145206		20	358699
15	206550		25	448648
20	268470		50	942552
	kaempferol			protocatechuic acid
5	122868		2.5	135346
10	258000		5	231208
20	595775		10	448064
25	780327		15	664824
50	1620283		20	891760
	vanillic acid		p-hydroxybenzoic acid
2.5	179884		2.5	158922
5	304334		5	260197
10	595219		10	523601
15	869994		15	774400
20	1180395		20	1027280
Profiles and content of bound polyphenols in quinoa BP-IDF
sample 1
		ug/mL	ug	ug/g
caffeic acid	836927	10.9453	218.906	218.906
p-coumaric acid	1168886	17.4526	349.051	349.051
ferulic acid	10329462	172.916	3458.32	3458.32
sinapic acid	1167439	18.3819	367.639	367.639
myricetin	127816	8.59003	171.801	171.801
quercetin	709976	38.1703	763.405	763.405
kaempferol	892604	28.462	569.239	569.239
sample 2
		ug/mL	ug	ug/g
caffeic acid	799099	10.4964	209.929	209.929
p-coumaric acid	1094615	16.3335	326.669	326.669
ferulic acid	10166893	170.205	3404.11	3404.11
sinapic acid	1094897	17.29	345.801	345.801
myricetin	116962	7.71045	154.209	154.209
quercetin	701576	37.7394	754.787	754.787
kaempferol	860551	27.5081	550.162	550.162
sample 3
		ug/mL	ug	ug/g
caffeic acid	852226	11.1268	222.537	222.537
p-coumaric acid	1172812	17.5117	350.234	350.234
ferulic acid	10489600	175.586	3511.72	3511.72
sinapic acid	1203760	18.9286	378.572	378.572
myricetin	132312	8.95438	179.088	179.088
quercetin	718954	38.6308	772.616	772.616
kaempferol	917974	29.2169	584.339	584.339
quinoa BP-IDF
caffeic acid	217.124	6.49019
p-coumaric acid	341.985	13.2771
ferulic acid	3458.05	53.8065
sinapic acid	364.004	16.6855
myricetin	168.366	12.79
quercetin	763.603	8.91618
kaempferol	567.914	17.1267
Profiles and content of bound polyphenols in rye BP-IDF
sample 1
		ug/mL	ug	ug/g
protocatechuic acid	324554	7.0464	140.928	140.928
vanillic acid	284884	4.53308	90.6616	90.6616
caffeic acid	713181	9.47694	189.539	189.539
p-coumaric acid	3248921	48.7944	975.889	975.889
ferulic acid	10092847	168.971	3379.42	3379.42
sinapic acid	1500714	23.3983	467.967	467.967
sample 2
		ug/mL	ug	ug/g
protocatechuic acid	357196	7.79954	155.991	155.991
vanillic acid	302779	4.84614	96.9228	96.9228
caffeic acid	742501	9.82485	196.497	196.497
p-coumaric acid	3362063	50.4993	1009.99	1009.99
ferulic acid	10461191	175.112	3502.25	3502.25
sinapic acid	1584987	24.6668	493.336	493.336
sample 3
		ug/mL	ug	ug/g
protocatechuic acid	273978	5.87947	117.589	117.589
vanillic acid	254898	4.0085	80.17	80.17
caffeic acid	706928	9.40274	188.055	188.055
p-coumaric acid	3072994	46.1436	922.872	922.872
ferulic acid	10249093	171.576	3431.52	3431.52
sinapic acid	1554440	24.207	484.14	484.14
rye BP-IDF
protocatechuic acid	138.169	19.3488
vanillic acid	89.2515	8.46492
caffeic acid	191.364	4.50717
p-coumaric acid	969.582	43.8979
ferulic acid	3437.73	61.6501
sinapic acid	481.814	12.8436
Profiles and content of bound polyphenols in wheat BP-IDF
sample 1
		ug/mL	ug	ug/g
protocatechuic acid	403515	8.86825	177.365	177.365
vanillic acid	498645	8.27265	165.453	165.453
caffeic acid	1258197	15.9441	318.881	318.881
p-coumaric acid	2388915	35.8359	716.718	716.718
ferulic acid	7426225	124.509	2490.19	2490.19
sinapic acid	2198789	33.9057	678.113	678.113
sample 2
		ug/mL	ug	ug/g
protocatechuic acid	439563	9.69998	194	194
vanillic acid	515514	8.56775	171.355	171.355
caffeic acid	1278315	16.1828	323.655	323.655
p-coumaric acid	2431068	36.4711	729.421	729.421
ferulic acid	7640558	128.083	2561.66	2561.66
ferulic acid	2253747	34.7329	694.657	694.657
sample 3
		ug/mL	ug	ug/g
protocatechuic acid	385426	8.45089	169.018	169.018
vanillic acid	446280	7.35657	147.131	147.131
caffeic acid	1193725	15.179	303.581	303.581
p-coumaric acid	2254215	33.8063	676.125	676.125
ferulic acid	7239238	121.392	2427.83	2427.83
sinapic acid	2071751	31.9935	639.87	639.87
wheat BP-IDF
protocatechuic acid	180.128	12.718
vanillic acid	161.313	12.6314
caffeic acid	315.372	10.4872
p-coumaric acid	707.422	27.8378
ferulic acid	2493.23	66.9652
sinapic acid	670.88	28.1008
Profiles and content of relased polyphenols from quinoa BP-IDF
after simulated GI digestion
sample 1
		ug/mL	ug	ug/g
caffeic acid	86659	2.04268	10.2134	10.2134
p-coumaric acid	140694	1.95981	9.79907	9.79907
ferulic acid	168609	3.50063	17.5032	17.5032
quercetin	23943	2.97825	14.8912	14.8912
kaempferol	37297	3.00943	15.0472	15.0472
sample 2
		ug/mL	ug	ug/g
caffeic acid	90394	2.087	10.435	10.435
p-coumaric acid	167351	2.36148	11.8074	11.8074
ferulic acid	178769	3.67003	18.3502	18.3502
quercetin	23259	2.94316	14.7158	14.7158
kaempferol	39958	3.08862	15.4431	15.4431
sample 3
		ug/mL	ug	ug/g
caffeic acid	85407	2.02783	10.1391	10.1391
p-coumaric acid	168076	2.3724	11.862	11.862
ferulic acid	183945	3.75634	18.7817	18.7817
quercetin	24089	2.98574	14.9287	14.9287
kaempferol	37199	3.00652	15.0326	15.0326
	mean	SD
caffeic acid	10.2625	0.153929
p-coumaric acid	11.1562	1.1756
ferulic acid	18.2117	0.650411
quercetin	14.8453	0.113653
kaempferol	15.1743	0.232917
Profiles and content of relased polyphenols from quinoa BP-IDF
during colonic fermentation
Colonic fermentation for 6 h
sample1
		ug/mL	ug/100 mg	ug/g
protocatechuic acid	62286	0.995132	0.995132	9.95132
p-hydroxybenzoic acid	215555	3.85275	3.85275	38.5275
caffeic acid	56933	1.68996	1.68996	16.8996
p-coumaric acid	173541	2.45475	2.45475	24.5475
ferulic acid	423953	7.75807	7.75807	77.5807
quercetin	61877	4.92418	4.92418	49.2418
kaempferol	39494	3.07481	3.07481	30.7481
sample2
		ug/mL	ug/100 mg	ug/g
protocatechuic acid	64943	1.05644	1.05644	10.5644
p-hydroxybenzoic acid	237200	4.2844	4.2844	42.844
caffeic acid	58219	1.70522	1.70522	17.0522
p-coumaric acid	179546	2.54523	2.54523	25.4523
ferulic acid	420119	7.69414	7.69414	76.9414
quercetin	64223	5.04453	5.04453	50.4453
kaempferol	39263	3.06794	3.06794	30.6794
sample3
		ug/mL	ug/100 mg	ug/g
protocatechuic acid	65662	1.07303	1.07303	10.7303
p-hydroxybenzoic acid	198374	3.51012	3.51012	35.1012
caffeic acid	58710	1.71104	1.71104	17.1104
p-coumaric acid	189651	2.6975	2.6975	26.975
ferulic acid	453664	8.25345	8.25345	82.5345
quercetin	64667	5.0673	5.0673	50.673
kaempferol	40856	3.11534	3.11534	31.1534
	mean	SD
protocatechuic acid	10.4153	0.410303
p-hydroxybenzoic acid	38.8242	3.87989
caffeic acid	17.0207	0.108889
p-coumaric acid	25.6583	1.22676
ferulic acid	79.0189	3.06136
quercetin	50.12	0.769039
kaempferol	30.8603	0.256166
Colonic fermentation for 12 h
sample1
		ug/mL	ug/100 mg	ug/g
protocatechuic acid	65393	1.06682	1.06682	10.6682
p-hydroxybenzoic acid	327184	6.07887	6.07887	60.7887
caffeic acid	110625	2.32706	2.32706	23.2706
p-coumaric acid	283500	4.11161	4.11161	41.1161
ferulic acid	578340	10.3322	10.3322	103.322
quercetin	83828	6.05022	6.05022	60.5022
kaempferol	29036	2.7636	2.7636	27.636
sample2
		ug/mL	ug/100 mg	ug/g
protocatechuic acid	71858	1.21598	1.21598	12.1598
p-hydroxybenzoic acid	338466	6.30386	6.30386	63.0386
caffeic acid	106503	2.27815	2.27815	22.7815
p-coumaric acid	298290	4.33446	4.33446	43.3446
ferulic acid	587029	10.4771	10.4771	104.771
quercetin	89831	6.35816	6.35816	63.5816
kaempferol	30021	2.79291	2.79291	27.9291
sample3
		ug/mL	ug/100 mg	ug/g
protocatechuic acid	69271	1.1563	1.1563	11.563
p-hydroxybenzoic acid	316948	5.87474	5.87474	58.7474
caffeic acid	138595	2.65895	2.65895	26.5895
p-coumaric acid	272104	3.93989	3.93989	39.3989
ferulic acid	573423	10.2502	10.2502	102.502
quercetin	91082	6.42234	6.42234	64.2234
kaempferol	29318	2.77199	2.77199	27.7199
	mean	SD
protocatechuic acid	11.4637	0.75077
p-hydroxybenzoic acid	60.8582	2.14642
caffeic acid	24.2139	2.07184
p-coumaric acid	41.2866	1.97836
ferulic acid	103.532	1.14872
quercetin	62.7691	1.9892
kaempferol	27.7617	0.150956
Colonic fermentation for 24 h
sample1
		ug/mL	ug/100 mg	ug/g
protocatechuic acid	63386	1.02051	1.02051	10.2051
p-hydroxybenzoic acid	450126	8.5306	8.5306	85.306
caffeic acid	65641	1.79328	1.79328	17.9328
p-coumaric acid	144980	2.0244	2.0244	20.244
ferulic acid	386455	7.13285	7.13285	71.3285
quercetin	49169	4.27229	4.27229	42.7229
kaempferol	20969	2.52354	2.52354	25.2354
sample2
		ug/mL	ug/100 mg	ug/g
protocatechuic acid	67220	1.10897	1.10897	11.0897
p-hydroxybenzoic acid	465000	8.82722	8.82722	88.2722
caffeic acid	66826	1.80735	1.80735	18.0735
p-coumaric acid	148318	2.07469	2.07469	20.7469
ferulic acid	400931	7.37422	7.37422	73.7422
quercetin	53259	4.4821	4.4821	44.821
kaempferol	23485	2.59841	2.59841	25.9841
sample3
		ug/mL	ug/100 mg	ug/g
protocatechuic acid	70491	1.18444	1.18444	11.8444
p-hydroxybenzoic acid	452710	8.58213	8.58213	85.8213
caffeic acid	67632	1.81691	1.81691	18.1691
p-coumaric acid	165348	2.3313	2.3313	23.313
ferulic acid	393816	7.25559	7.25559	72.5559
quercetin	46164	4.11814	4.11814	41.1814
kaempferol	21284	2.53291	2.53291	25.3291
	mean	SD
protocatechuic acid	11.0464	0.82052
p-hydroxybenzoic acid	86.4665	1.58486
caffeic acid	18.0585	0.118836
p-coumaric acid	21.4346	1.64604
ferulic acid	72.5422	1.20687
quercetin	42.9084	1.82687
kaempferol	25.5162	0.407915

## Sheet: Carbonyl scavenge capacity
Carbonyl scavenging capacity of three whole grains BP-IDF
Quinoa BP-IDF
MGO scavenging capacity
	Peak area1	Peak area2	Peak area3
cellulose (blank)	1456999	1425159	1478864
quinoa BP-IDF (sample)	561426	558908	565306
	0.61467	0.607828	0.617743
mean	0.613413
SD	0.00507568
GO scavenging capacity
	Peak area1	Peak area2	Peak area3
cellulose (blank)	1881961	1863105	1861468
quinoa BP-IDF (sample)	1253984	1196320	1231845
	0.333682	0.357889	0.33824
mean	0.34327
SD	0.0128636
ACR scavenging capacity
	Peak area1	Peak area2	Peak area3
cellulose (blank)	4706483	4692481	4606089
quinoa BP-IDF (sample)	1027409	1056014	964843
	0.781703	0.774956	0.790529
mean	0.782396
SD	0.0078094
MDA scavenging capacity
	Peak area1	Peak area2	Peak area3
cellulose (blank)	2175183	2123505	2155839
quinoa BP-IDF (sample)	1892182	1821436	1853336
	0.130104	0.14225	0.140318
mean	0.137558
SD	0.00652647
Rye BP-IDF
MGO scavenging capacity
	Peak area1	Peak area2	Peak area3
cellulose (blank)	1456999	1425159	1478864
rye BP-IDF (sample)	652860	676681	665779
	0.551915	0.525189	0.549804
mean	0.542302
SD	0.0148581
GO scavenging capacity
	Peak area1	Peak area2	Peak area3
cellulose (blank)	1881961	1863105	1861468
rye BP-IDF (sample)	1375061	1346190	1302946
	0.269347	0.277448	0.300044
mean	0.28228
SD	0.0159087
ACR scavenging capacity
	Peak area1	Peak area2	Peak area3
cellulose (blank)	4706483	4692481	4606089
rye BP-IDF (sample)	1204795	1198859	1162963
	0.744014	0.744515	0.747516
mean	0.745348
SD	0.00189411
MDA scavenging capacity
	Peak area1	Peak area2	Peak area3
cellulose (blank)	2175183	2123505	2155839
rye BP-IDF (sample)	1926008	1907244	1896123
	0.114554	0.101842	0.120471
mean	0.112289
SD	0.00951899
Wheat BP-IDF
MGO scavenging capacity
	Peak area1	Peak area2	Peak area3
cellulose (blank)	1456999	1425159	1478864
wheat BP-IDF (sample)	908458	873196	900915
	0.376487	0.387299	0.390806
mean	0.384864
SD	0.00746373
GO scavenging capacity
	Peak area1	Peak area2	Peak area3
cellulose (blank)	1881961	1863105	1861468
wheat BP-IDF (sample)	1492224	1483277	1467380
	0.207091	0.203868	0.211708
mean	0.207556
SD	0.00394057
ACR scavenging capacity
	Peak area1	Peak area2	Peak area3
cellulose (blank)	4706483	4692481	4636089
wheat BP-IDF (sample)	2256787	2187619	2219283
	0.520494	0.533803	0.521303
mean	0.5252
SD	0.00746165
MDA scavenging capacity
	Peak area1	Peak area2	Peak area3
cellulose (blank)	2175183	2123505	2155839
wheat BP-IDF (sample)	2053515	2004279	2027383
	0.0559346	0.0561459	0.0595852
mean	0.0572219
SD	0.00204939
Carbonyl scavenging capacity of alkali-hydrolyzed IDF
Alkali-hydrolyzed IDF from quinoa
MGO scavenging capacity
	Peak area1	Peak area2	Peak area3
cellulose (blank)	1456999	1425159	1478864
alkali-hydrolyzed IDF (sample)	1264364	1238871	1281354
	0.132214	0.130714	0.133555
mean	0.132161
SD	0.00142142
GO scavenging capacity
	Peak area1	Peak area2	Peak area3
cellulose (blank)	1881961	1863105	1861468
alkali-hydrolyzed IDF (sample)	1725506	1696782	1706728
	0.083134	0.0892719	0.0831279
mean	0.085178
SD	0.00354548
ACR scavenging capacity
	Peak area1	Peak area2	Peak area3
cellulose (blank)	4706483	4692481	4606089
alkali-hydrolyzed IDF (sample)	3976479	3972978	3903700
	0.155106	0.153331	0.152491
mean	0.153643
SD	0.00133492
MDA scavenging capacity
	Peak area1	Peak area2	Peak area3
cellulose (blank)	2175183	2123505	2155839
alkali-hydrolyzed IDF (sample)	2092156	2051774	2076104
	0.0381701	0.0337795	0.0369856
mean	0.0363118
SD	0.00227154
Alkali-hydrolyzed IDF from rye
MGO scavenging capacity
	Peak area1	Peak area2	Peak area3
cellulose (blank)	1456999	1425159	1478864
alkali-hydrolyzed IDF (sample)	1306409	1278014	1317843
	0.103356	0.103248	0.108882
mean	0.105162
SD	0.00322169
GO scavenging capacity
	Peak area1	Peak area2	Peak area3
cellulose (blank)	1881961	1863105	1861468
alkali-hydrolyzed IDF (sample)	1763175	1748247	1742030
	0.0631182	0.0616487	0.0641633
mean	0.0623835
SD	0.00126327
ACR scavenging capacity
	Peak area1	Peak area2	Peak area3
cellulose (blank)	4706483	4692481	4606089
alkali-hydrolyzed IDF (sample)	4078412	4093920	4038168
	0.133448	0.127557	0.123298
mean	0.128101
SD	0.00509688
MDA scavenging capacity
	Peak area1	Peak area2	Peak area3
cellulose (blank)	2175183	2123505	2155839
alkali-hydrolyzed IDF (sample)	2119546	2072733	2098130
	0.0255781	0.0239095	0.0267687
mean	0.0254188
SD	0.00143623
Alkali-hydrolyzed IDF from wheat
MGO scavenging capacity
	Peak area1	Peak area2	Peak area3
cellulose (blank)	1456999	1425159	1478864
alkali-hydrolyzed IDF (sample)	1343998	1314323	1362824
	0.0775574	0.077771	0.0784656
mean	0.0779313
SD	0.000474893
GO scavenging capacity
	Peak area1	Peak area2	Peak area3
cellulose (blank)	1881961	1863105	1861468
alkali-hydrolyzed IDF (sample)	1794215	1776915	1776201
	0.0466248	0.0462615	0.0458063
mean	0.0462309
SD	0.000410084
ACR scavenging capacity
	Peak area1	Peak area2	Peak area3
cellulose (blank)	4706483	4692481	4606089
alkali-hydrolyzed IDF (sample)	4216099	4252962	4192541
	0.104193	0.0936645	0.0897829
mean	0.0958802
SD	0.00745634
MDA scavenging capacity
	Peak area1	Peak area2	Peak area3
cellulose (blank)	2175183	2123505	2155839
alkali-hydrolyzed IDF (sample)	2147311	2094518	2127229
	0.0128136	0.0136505	0.0132709
mean	0.013245
SD	0.000419056
Carbonyl scavenging capacity of dephenolized IDF
Dephenolized IDF from quinoa
MGO scavenging capacity
	Peak area1	Peak area2	Peak area3
cellulose (blank)	1456999	1425159	1478864
dephenolized IDF (sample)	1422596	1399768	1431966
	0.0236122	0.0178163	0.0317122
mean	0.0243802
SD	0.00697972
GO scavenging capacity
	Peak area1	Peak area2	Peak area3
cellulose (blank)	1881961	1863105	1861468
dephenolized IDF (sample)	1862769	1826592	1835849
	0.0101979	0.0195979	0.0137628
mean	0.0145195
SD	0.0047455
ACR scavenging capacity
	Peak area1	Peak area2	Peak area3
cellulose (blank)	4706483	4692481	4606089
dephenolized IDF (sample)	4563188	4570699	4475241
	0.0304463	0.0259526	0.0284076
mean	0.0282688
SD	0.00225007
MDA scavenging capacity
	Peak area1	Peak area2	Peak area3
cellulose (blank)	2175183	2123505	2155839
dephenolized IDF (sample)	2160029	2110444	2147130
	0.00696677	0.00615068	0.00403973
mean	0.00571906
SD	0.0015105
Dephenolized IDF from rye
MGO scavenging capacity
	Peak area1	Peak area2	Peak area3
cellulose (blank)	1456999	1425159	1478864
dephenolized IDF (sample)	1428901	1395724	1447671
	0.0192848	0.0206538	0.0210925
mean	0.0203437
SD	0.0009429
GO scavenging capacity
	Peak area1	Peak area2	Peak area3
cellulose (blank)	1881961	1863105	1861468
dephenolized IDF (sample)	1857238	1840164	1832966
	0.0131368	0.0123133	0.0153116
mean	0.0135872
SD	0.00154904
ACR scavenging capacity
	Peak area1	Peak area2	Peak area3
cellulose (blank)	4706483	4692481	4606089
dephenolized IDF (sample)	4591300	4591068	4510830
	0.0244733	0.0216118	0.0206811
mean	0.0222554
SD	0.0019763
MDA scavenging capacity
	Peak area1	Peak area2	Peak area3
cellulose (blank)	2175183	2123505	2155839
dephenolized IDF (sample)	2165166	2115271	2146512
	0.00460513	0.00387755	0.00432639
mean	0.00426969
SD	0.000367088
Dephenolized IDF from wheat
MGO scavenging capacity
	Peak area1	Peak area2	Peak area3
cellulose (blank)	1456999	1425159	1478864
dephenolized IDF (sample)	1430906	1398717	1451962
	0.0179087	0.0185537	0.018191
mean	0.0182178
SD	0.000323331
GO scavenging capacity
	Peak area1	Peak area2	Peak area3
cellulose (blank)	1881961	1863105	1861468
dephenolized IDF (sample)	1858520	1840468	1840189
	0.0124556	0.0121501	0.0114313
mean	0.0120124
SD	0.00052588
ACR scavenging capacity
	Peak area1	Peak area2	Peak area3
cellulose (blank)	4706483	4692481	4606089
dephenolized IDF (sample)	4611512	4602379	4523998
	0.0201788	0.0192014	0.0178223
mean	0.0190675
SD	0.00118393
MDA scavenging capacity
	Peak area1	Peak area2	Peak area3
cellulose (blank)	2175183	2123505	2155839
dephenolized IDF (sample)	2167252	2117409	2147817
	0.00364613	0.00287073	0.00372106
mean	0.00341264
SD	0.000470802
Carbonyl scavenging capacity of GI-digested quinoa BP-IDF
MGO scavenging capacity
	Peak area1	Peak area2	Peak area3
GI-digested residue of dephenolized IDF (blank)	1424160	1398216	1400925
GI-digested residue of quinoa BP-IDF (sample)	640453	613246	621040
	0.550294	0.561408	0.556693
mean	0.556132
SD	0.00557823
GO scavenging capacity
	Peak area1	Peak area2	Peak area3
GI-digested residue of dephenolized IDF (blank)	1842635	1850210	1831481
GI-digested residue of quinoa BP-IDF (sample)	1258781	1245422	1238968
	0.316858	0.326875	0.323516
mean	0.322416
SD	0.00509825
ACR scavenging capacity
	Peak area1	Peak area2	Peak area3
GI-digested residue of dephenolized IDF (blank)	4685257	4628359	4717140
GI-digested residue of quinoa BP-IDF (sample)	1346338	1308318	1375176
	0.712644	0.717326	0.708473
mean	0.712814
SD	0.00442907
MDA scavenging capacity
	Peak area1	Peak area2	Peak area3
GI-digested residue of dephenolized IDF (blank)	2164684	2139578	2162120
GI-digested residue of quinoa BP-IDF (sample)	1897512	1876379	1891998
	0.123423	0.123014	0.124934
mean	0.12379
SD	0.00101107
Carbonyl scavenging capacity of fermented quinoa BP-IDF
Colonic fermentation for 6 h
MGO scavenging capacity
	Peak area1	Peak area2	Peak area3
fermented residue of dephenolized IDF (blank)	1455348	1423308	1436789
fermented residue of quinoa BP-IDF (sample)	775614	802760	784705
	0.467059	0.43599	0.453848
mean	0.452299
SD	0.0155925
GO scavenging capacity
	Peak area1	Peak area2	Peak area3
fermented residue of dephenolized IDF (blank)	1854666	1871271	1868512
fermented residue of quinoa BP-IDF (sample)	1407498	1387562	1379544
	0.241104	0.258492	0.261688
mean	0.253762
SD	0.0110775
ACR scavenging capacity
	Peak area1	Peak area2	Peak area3
fermented residue of dephenolized IDF (blank)	4696035	4723071	4701894
fermented residue of quinoa BP-IDF (sample)	1875568	1845944	1862533
	0.600606	0.609164	0.603876
mean	0.604549
SD	0.0043187
MDA scavenging capacity
	Peak area1	Peak area2	Peak area3
fermented residue of dephenolized IDF (blank)	2168023	2183750	2187748
fermented residue of quinoa BP-IDF (sample)	1957658	1968268	1977445
	0.0970308	0.0986752	0.0961276
mean	0.0972779
SD	0.00129165
Carbonyl scavenging capacity of fermented quinoa BP-IDF
Colonic fermentation for 12 h
MGO scavenging capacity
	Peak area1	Peak area2	Peak area3
fermented residue of dephenolized IDF (blank)	1476932	1479471	1495133
fermented residue of quinoa BP-IDF (sample)	857509	867245	887292
	0.419398	0.413814	0.406546
mean	0.413253
SD	0.00644435
GO scavenging capacity
	Peak area1	Peak area2	Peak area3
fermented residue of dephenolized IDF (blank)	1864506	1891074	1873820
fermented residue of quinoa BP-IDF (sample)	1458008	1462157	1466087
	0.218019	0.226811	0.217595
mean	0.220808
SD	0.00520307
ACR scavenging capacity
	Peak area1	Peak area2	Peak area3
fermented residue of dephenolized IDF (blank)	4754756	4726089	4733168
fermented residue of quinoa BP-IDF (sample)	2198528	2198086	2178315
	0.537615	0.534904	0.539777
mean	0.537432
SD	0.00244152
MDA scavenging capacity
	Peak area1	Peak area2	Peak area3
fermented residue of dephenolized IDF (blank)	2190416	2197222	2185112
fermented residue of quinoa BP-IDF (sample)	2038756	2036456	2017142
	0.069238	0.0731678	0.0768702
mean	0.073092
SD	0.00381667
Carbonyl scavenging capacity of fermented quinoa BP-IDF
Colonic fermentation for 24 h
MGO scavenging capacity
	Peak area1	Peak area2	Peak area3
fermented residue of dephenolized IDF (blank)	1489438	1509086	1493016
fermented residue of quinoa BP-IDF (sample)	960378	962800	962472
	0.355208	0.361998	0.355351
mean	0.357519
SD	0.00387974
GO scavenging capacity
	Peak area1	Peak area2	Peak area3
fermented residue of dephenolized IDF (blank)	1894708	1875174	1897980
fermented residue of quinoa BP-IDF (sample)	1521566	1527080	1525533
	0.196939	0.185633	0.196233
mean	0.192935
SD	0.00633373
ACR scavenging capacity
	Peak area1	Peak area2	Peak area3
fermented residue of dephenolized IDF (blank)	4896035	4853071	4701894
fermented residue of quinoa BP-IDF (sample)	2410443	2401685	2308581
	0.507674	0.505121	0.50901
mean	0.507268
SD	0.00197644
MDA scavenging capacity
	Peak area1	Peak area2	Peak area3
fermented residue of dephenolized IDF (blank)	2208253	2197803	2178385
fermented residue of quinoa BP-IDF (sample)	2092808	2081044	2066330
	0.0522789	0.0531253	0.0514395
mean	0.0522812
SD	0.000842923
Carbonyl scavenging capacity of released polyphenols from quinoa BP-IDF
Colonic fermentation for 6 h
MGO scavenging capacity
	Peak area1	Peak area2	Peak area3
methanol (blank)	1523929	1515605	1518284
released polyphenols (sample)	1427216	1425472	1421791
	0.0634629	0.05947	0.063554
mean	0.0621623
SD	0.00233206
GO scavenging capacity
	Peak area1	Peak area2	Peak area3
methanol (blank)	1905170	1895327	1911906
released polyphenols (sample)	1824839	1819485	1832905
	0.0421647	0.0400153	0.0413205
mean	0.0411668
SD	0.00108295
ACR scavenging capacity
	Peak area1	Peak area2	Peak area3
methanol (blank)	5075160	5087179	5117593
released polyphenols (sample)	4686546	4701772	4727923
	0.0765718	0.0757605	0.0761432
mean	0.0761585
SD	0.000405874
MDA scavenging capacity
	Peak area1	Peak area2	Peak area3
methanol (blank)	2206117	2212245	2209218
released polyphenols (sample)	2177321	2182483	2179799
	0.0130528	0.0134533	0.0133165
mean	0.0132742
SD	0.000203573
Carbonyl scavenging capacity of released polyphenols from quinoa BP-IDF
Colonic fermentation for 12 h
MGO scavenging capacity
	Peak area1	Peak area2	Peak area3
methanol (blank)	1514561	1523140	1518638
released polyphenols (sample)	1396756	1403815	1402644
	0.0777816	0.0783415	0.0763803
mean	0.0775011
SD	0.00101023
GO scavenging capacity
	Peak area1	Peak area2	Peak area3
methanol (blank)	1898148	1901673	1914183
released polyphenols (sample)	1800924	1797683	1811258
	0.0512205	0.0546834	0.0537697
mean	0.0532245
SD	0.0017947
ACR scavenging capacity
	Peak area1	Peak area2	Peak area3
methanol (blank)	5088247	5084298	5095721
released polyphenols (sample)	4623054	4615360	4625106
	0.091425	0.0922326	0.0923549
mean	0.0920042
SD	0.000505297
MDA scavenging capacity
	Peak area1	Peak area2	Peak area3
methanol (blank)	2189357	2203356	2198552
released polyphenols (sample)	2151208	2164319	2160732
	0.0174248	0.0177171	0.0172022
mean	0.017448
SD	0.000258204
Carbonyl scavenging capacity of released polyphenols from quinoa BP-IDF
Colonic fermentation for 24 h
MGO scavenging capacity
	Peak area1	Peak area2	Peak area3
methanol (blank)	1515877	1513229	1518198
released polyphenols (sample)	1436434	1432294	1438203
	0.0524073	0.053485	0.0526908
mean	0.052861
SD	0.000558646
GO scavenging capacity
	Peak area1	Peak area2	Peak area3
methanol (blank)	1908673	1909136	1893806
released polyphenols (sample)	1835293	1838227	1821302
	0.0384456	0.0371419	0.0382848
mean	0.0379574
SD	0.000710803
ACR scavenging capacity
	Peak area1	Peak area2	Peak area3
methanol (blank)	5085608	5093174	5087780
released polyphenols (sample)	4762424	4768653	4762344
	0.0635487	0.0637168	0.0639642
mean	0.0637433
SD	0.000209007
MDA scavenging capacity
	Peak area1	Peak area2	Peak area3
methanol (blank)	2192073	2194554	2197902
released polyphenols (sample)	1996104	1995716	1997201
	0.0893989	0.0906052	0.0913148
mean	0.0904396
SD	0.000968604
